# Supplementary material for: Identification and Expression Analysis of the WOX Transcription Factor Family in Foxtail Millet (Setaria italica L.)
Source: MDPI journal article supplement (doi:10.3390/genes15040476), 2024-04-10
Supplement: s1 [file s1]

EAR motif

190200210220

SiWOX1.....AAAVSQQQHQQLYYSQCP.....G.....SMTVFINGVATEVPR..GPIDL

SiWOX2TAATATTTTTS.....VTIQQQ..HHQLLQLQDQY..SFYTTNSQPPSSHD.....ASSAATASLEL..SLSSWCSPYP..AGTM..

SiWOX3.....DASTAML..LP..SSAPSNVAAATSSVLTQQLGGLDPGLIGGTPLPPPPTATVVVVVARDA.....VTCAVTAQFSVPAMRLDV

SiWOX4TATTARLTGLPASSAAPNGVVA...NYDLMQLQGLAADGALGAGATTTSTGAPVAVATAAAVAGEQQEGGGVAALCITDSVTGRSVAHSVAAARLDV

SiWOX6.....ASASFSGES.....ESLEESPDSEALAVPFY..DFFGLQS.....GGR.....

SiWOX7..ASEQCR.....YF..SFFDVAA.....GRDPPLEL..RLCSFGP.....

SiWOX8..YF..SFFDVAA.....GRDPPLEL..RLCSFGP.....

SiWOX9.....YF..SFFDVAA.....GRDPPLEL..RLCSFGP.....

SiWOX10.....YF..SFFDVAA.....GRDPPLEL..RLCSFGP.....

SiWOX11..KSSSCS.....TSTN.....

SiWOX12..KSSSCS.....TSTN.....

SiWOX13.....VA..PSTAGHQQQYYSQCQS.....P.....AATITVFINGVPMEVPR..GPIDL

230240250260

SiWOX1RSMFGQDVMLVHSTGGL.....LPVNEYGVLMQSLQMGESYFLVTRG.

SiWOX2.....

SiWOX3.....

SiWOX4KLAFGDAAVLVRHTGEP.....VLVDESGVTVEPLQQDTLYLLMVTH

SiWOX5RAQFGEEAAVLFRCAGERGLDLEHVPVDASGCTVQPLQHGAFFYYVLV...

SiWOX6.....

SiWOX7.....

SiWOX8.....

SiWOX9AGTFGHDAMLVHSSGEI.....LPVNEHGVLMKSLQMGECEYYLVSRST

SiWOX10.....

SiWOX11.....

SiWOX12.....

SiWOX13RAMFGQDVMLVHSTGAL.....LPVNDYGILTQSLQMGESYFLVARPT
