# Supplementary figures and images for: Identification and Expression Analysis of the WOX Transcription Factor Family in Foxtail Millet (Setaria italica L.)
Source: MDPI journal article supplement (doi:10.3390/genes15040476), 2024-04-10

motif 1

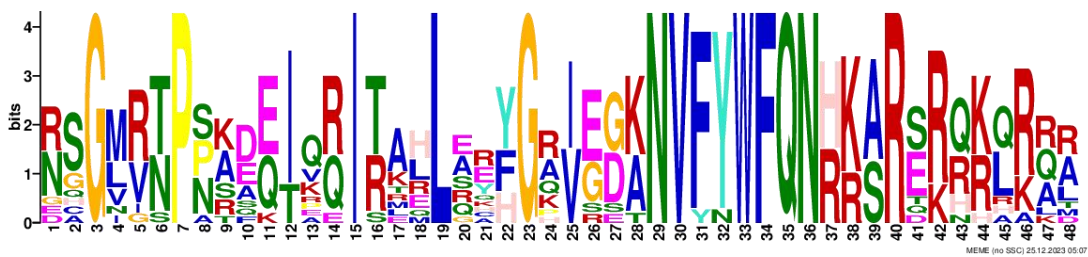

motif 2

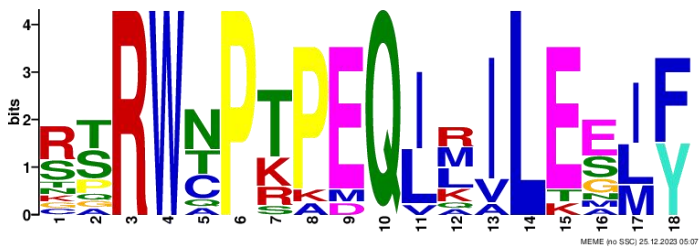

motif 3

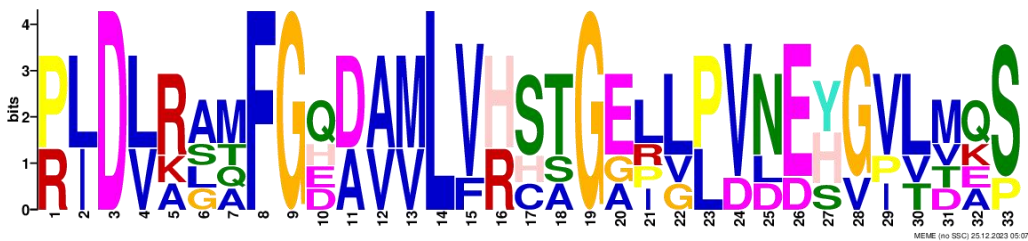

motif 4

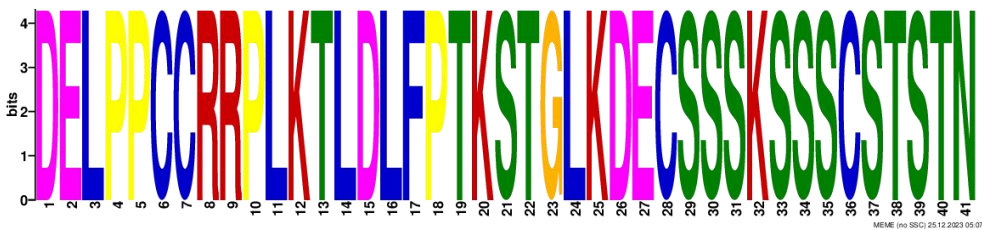

motif 5

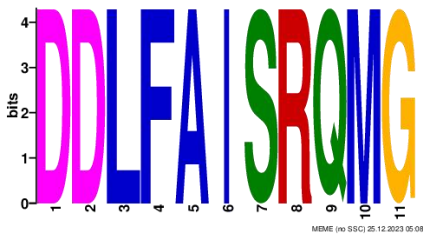

motif 6

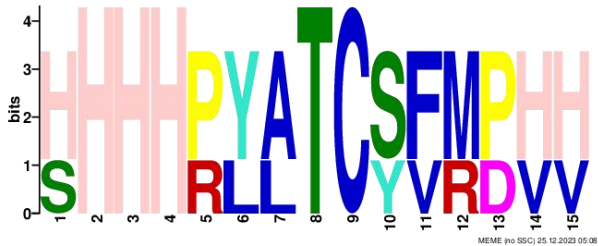

motif 7

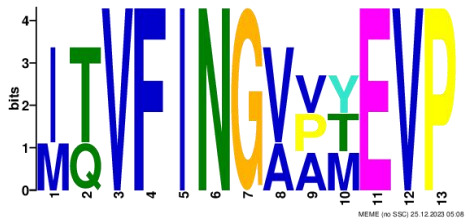

motif 8

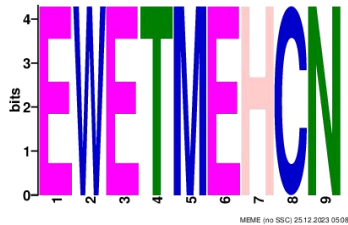

motif 9

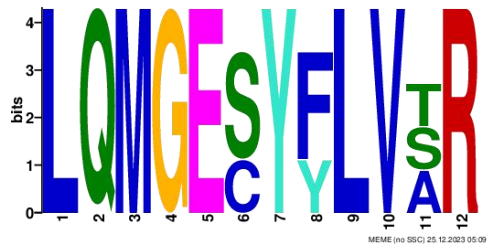

motif 10

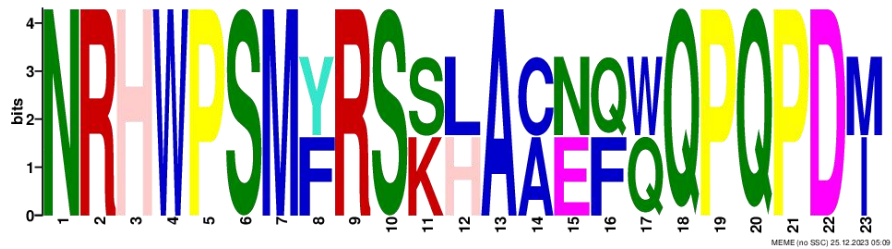

motif 11

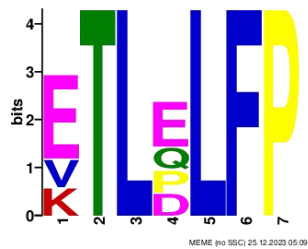

motif 12

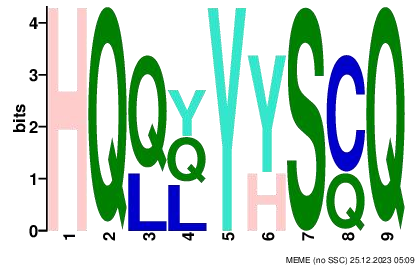

Supplement: s1 [file s1]
